# Supplementary material for: Type III secretion system 1 genes in Vibrio parahaemolyticus are positively regulated by ExsA and negatively regulated by ExsD
Source: PubMed Central journal article supplement (PMC2610376; doi:10.1111/j.1365-2958.2008.06326.x), 2008-06-16

Supplementary Fig. S1. RT-PCR showing that expression of T3SS1 genes are fully restored in  $\Delta$ exsD strain growing in LB-S compared to wild-type strain growing in DMEM. cDNAs (+) made from total RNA isolated from *V. parahaemolyticus* strain NY-4 under DMEM growth condition and  $\Delta$ exsD strain under LB-S growth condition were used as templates for PCR. Mock reactions (-), which did not contain reverse transcriptase in the RT reaction, were used as controls against genomic contamination of the RNA preparations. *SecY* was a house-keeping gene used as an internal control to ensure RNA was present in all samples. cDNA templates were serially diluted (5-fold) and RT-PCR was performed with various dilutions of the templates for each T3SS1 gene.

Supplementary Fig. S2. SDS-PAGE analysis of purified ExsA (lane 1), ExsD (lane 3) and Vp1656 (lane 2). His-tagged proteins ExsA, ExsD and Vp1656 were expressed and purified by using an Ni<sup>2+</sup> resin column.

Supplementary Fig. S3. ExsD does not bind the promoter region of *vp1668* and *vp1687*. (A) Gel shift analysis using ~180 bp of putative promoter region of *vp1668* probe and purified ExsD; (B) Gel shift analysis using ~180 bp of putative promoter region of *vp1687* probe and purified ExsD. Protein Vp1656 was included as a negative control. The concentration of DNA and protein were shown in the figure.

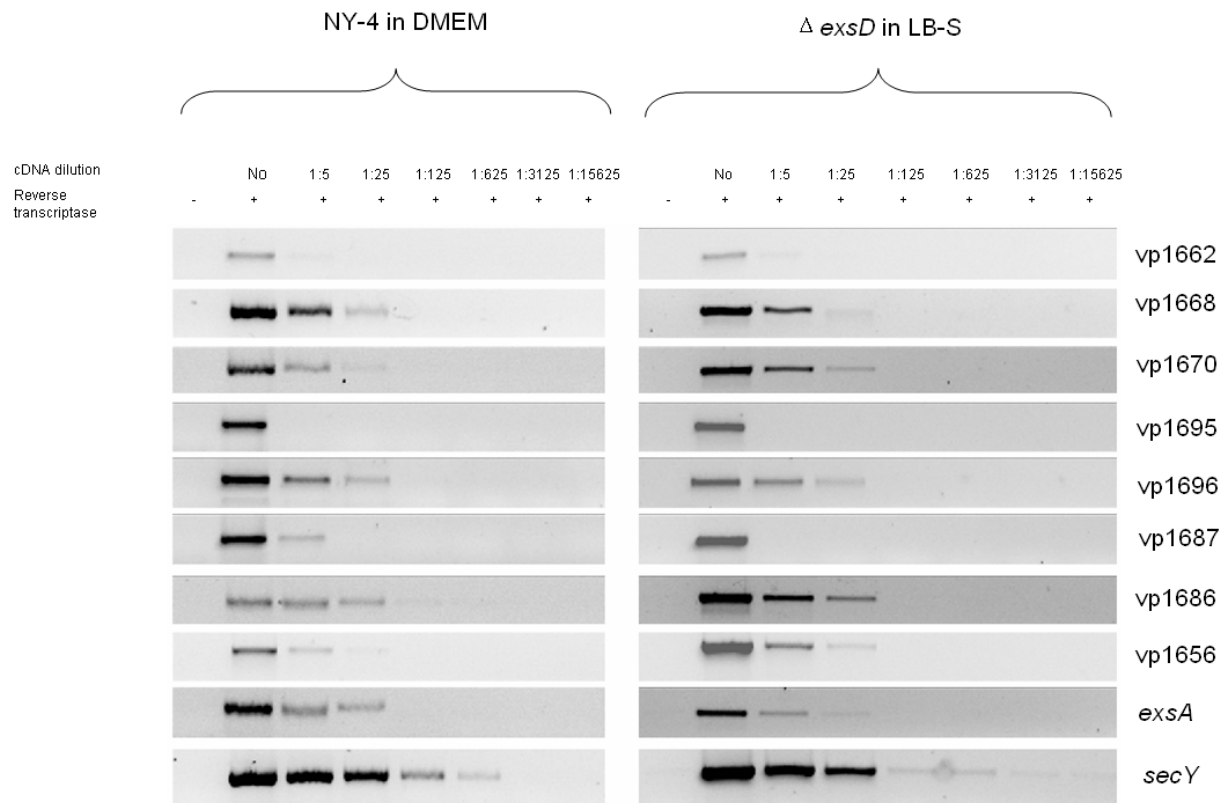

Supplementary Fig. S1

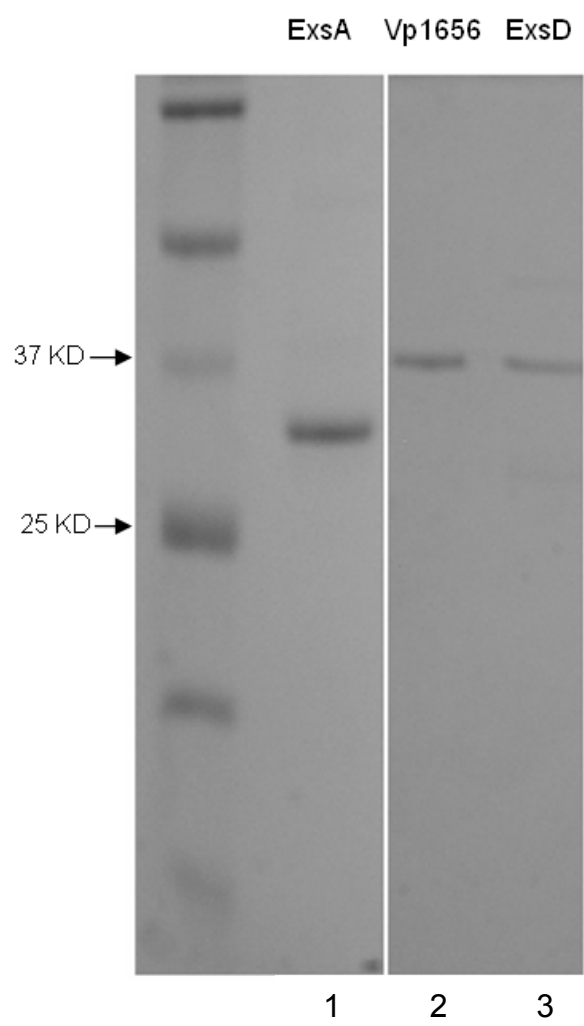

Supplementary Fig. S2

A

|                           |      |      |     |      |     |      |      |     |
|---------------------------|------|------|-----|------|-----|------|------|-----|
| DNA (vp1668, ng)          | 200  | 1000 | 200 | 200  | 200 | 200  | 200  | 200 |
| Protein (ExsD, $\mu$ g)   | -    | 0.15 | 0.6 | 0.45 | 0.3 | 0.15 | 0.09 | -   |
| Protein (vp1656, $\mu$ g) | 0.15 | -    | -   | -    | -   | -    | -    | -   |

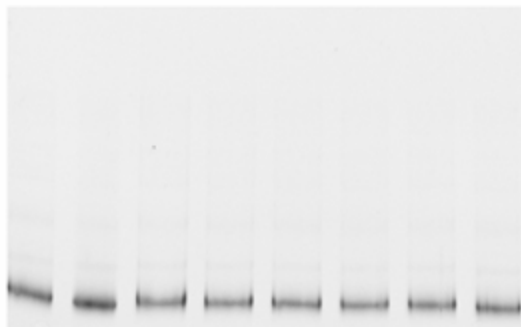

B

|                           |     |      |     |     |      |     |      |      |
|---------------------------|-----|------|-----|-----|------|-----|------|------|
| DNA (vp1687, ng)          | 200 | 1000 | 200 | 200 | 200  | 200 | 200  | 200  |
| Protein (ExsD, $\mu$ g)   | -   | 0.15 | 0.9 | 0.6 | 0.45 | 0.2 | 0.15 | 0.09 |
| Protein (vp1656, $\mu$ g) | 0.5 | -    | -   | -   | -    | -   | -    | -    |

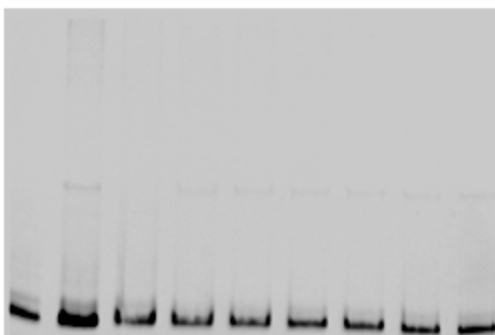

Supplement: mmi0069-0747-SD1.pdf [file mmi0069-0747-SD1.pdf]
